# Supplementary material for: Crystallization of Form II Paracetamol with the Assistance of Carboxylic Acids toward Batch and Continuous Processes
Source: MDPI journal article supplement (doi:10.3390/pharmaceutics14051099), 2022-05-20
Supplement: s1 [file s1]

## Supplementary Materials

# Crystallization of Form II Paracetamol with the Assistance of Carboxylic Acids toward Batch and Continuous Processes

Kuan Lin Yeh, Hung Lin Lee, Tu Lee\*

Department of Chemical and Materials Engineering, National Central University

300 Zhongda Road, Zhongli District, Taoyuan City 320317, Taiwan R.O.C.

This PDF file includes:

---

\* Corresponding Author. Tel: +886-3-4227151 ext. 34204. Fax: +886-3-4252296.

Email: [tulee@cc.ncu.edu.tw](mailto:tulee@cc.ncu.edu.tw)

**Table S1.** Experimental conditions for batch cooling crystallization using a 0.5 L glass vessel (Figure S1) in Expt. 1 to 20.

| <b>Expt.</b> | <b>PCA<br/>(g)</b> | <b>FUM<br/>(g)</b> | <b>OXA<br/>(g)</b> | <b>Water<br/>(mL)</b> | <b>Agitation speed<br/>(rpm)</b> | <b>Residence time<br/>(h)</b> |
|--------------|--------------------|--------------------|--------------------|-----------------------|----------------------------------|-------------------------------|
| 1            | 20                 | -                  | -                  | 340                   | 300                              | 1.5                           |
| 2            | 20                 | -                  | -                  | 340                   | 200                              | 1.5                           |
| 3            | 20                 | -                  | -                  | 340                   | 100                              | 1.5                           |
| 4            | 20                 | 4                  | -                  | 340                   | 300                              | 1.5                           |
| 5            | 20                 | 4                  | -                  | 340                   | 200                              | 1.5                           |
| 6            | 20                 | 4                  | -                  | 340                   | 100                              | 1.5                           |
| 7            | 20                 | 10                 | -                  | 340                   | 300                              | 1.5                           |
| 8            | 20                 | 10                 | -                  | 340                   | 200                              | 1.5                           |
| 9            | 20                 | 10                 | -                  | 340                   | 100                              | 1.5                           |
| 10           | 20                 | -                  | 12                 | 340                   | 300                              | 1.5                           |
| 11           | 20                 | -                  | 12                 | 340                   | 200                              | 1.5                           |
| 12           | 20                 | -                  | 12                 | 340                   | 100                              | 1.5                           |
| 13           | 20                 | -                  | 24                 | 340                   | 300                              | 1.5                           |
| 14           | 20                 | -                  | 24                 | 340                   | 200                              | 1.5                           |
| 15           | 20                 | -                  | 24                 | 340                   | 100                              | 1.5                           |
| 16           | 20                 | -                  | -                  | 340                   | 0                                | 4                             |
| 17           | 20                 | 4                  | -                  | 340                   | 0                                | 4                             |
| 18           | 20                 | 10                 | -                  | 340                   | 0                                | 4                             |
| 19           | 20                 | -                  | 12                 | 340                   | 0                                | 4                             |
| 20           | 20                 | -                  | 24                 | 340                   | 0                                | 4                             |

**Table S2.** Experimental conditions for continuous cooling crystallization using a tubular crystallizer (Figure S2) in Expt. 21 to 28.

| <b>Expt.</b> | <b>PCA<br/>(g)</b> | <b>FUM<br/>(g)</b> | <b>Water<br/>(mL)</b> | <b>Flow rate<br/>(mL/min)</b> |
|--------------|--------------------|--------------------|-----------------------|-------------------------------|
| 21           | 20                 | 4                  | 340                   | 75                            |
| 22           | 20                 | 4                  | 340                   | 150                           |
| 23           | 20                 | 6                  | 340                   | 75                            |
| 24           | 20                 | 6                  | 340                   | 150                           |
| 25           | 20                 | 10                 | 340                   | 75                            |
| 26           | 20                 | 10                 | 340                   | 150                           |
| 27           | 15                 | 7.5                | 340                   | 75                            |
| 28           | 15                 | 7.5                | 340                   | 150                           |

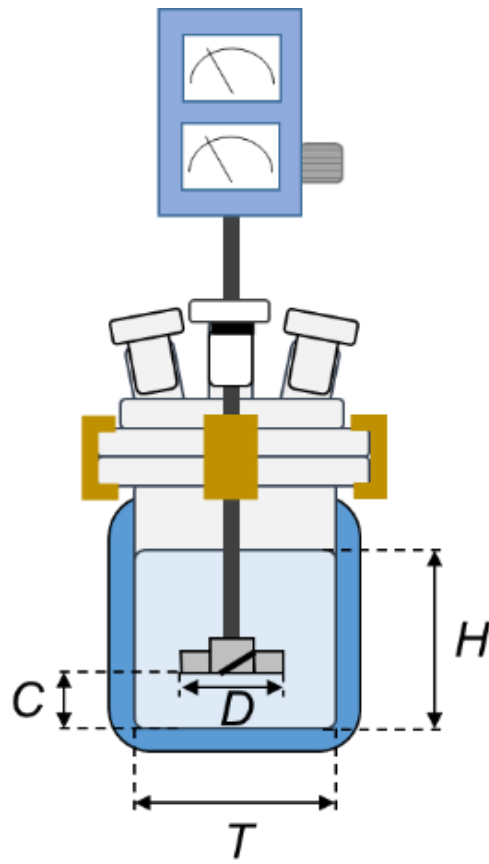

**Figure S1.** Configuration of a 0.5 L jacketed glass vessel as a batch crystallizer:  $T = 78$  mm,  $H = 71$  mm,  $D = 30$  mm, and  $C = 23$  mm.

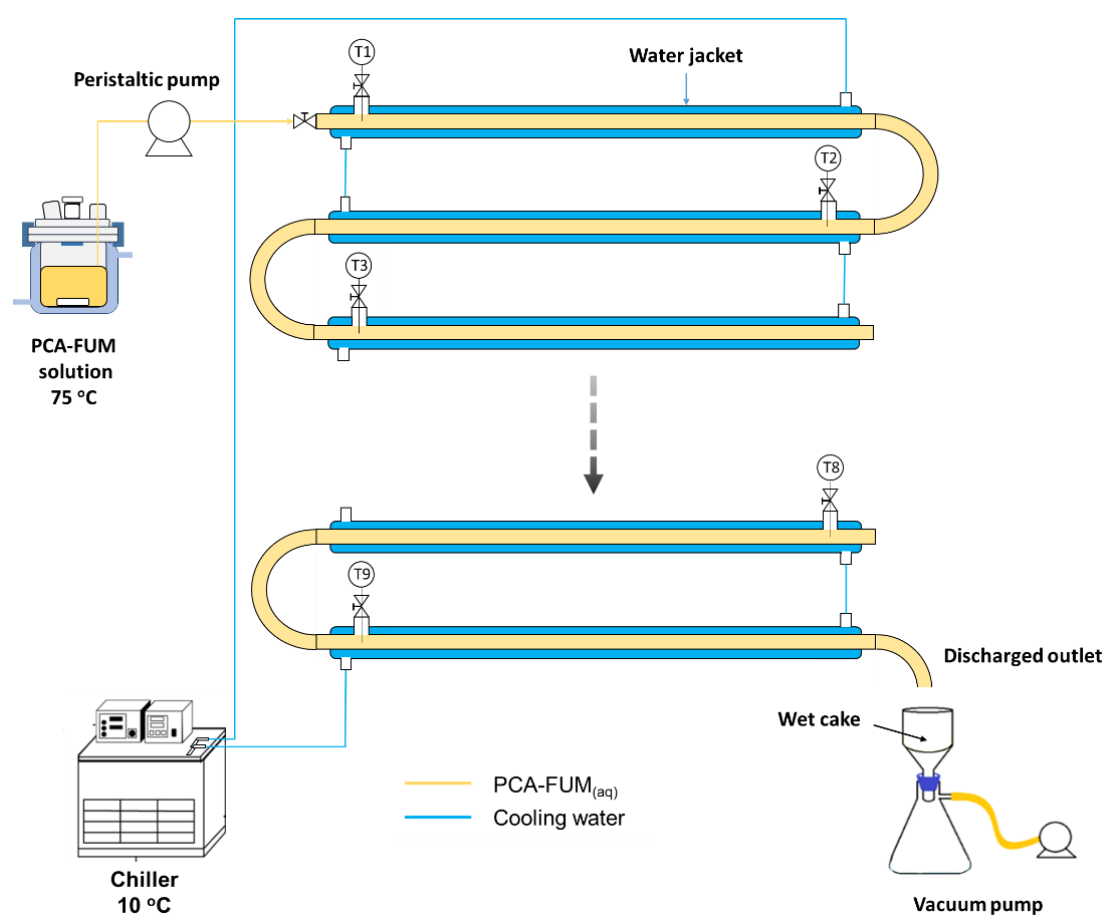

**Figure S2.** Experimental setup for continuous crystallization using a tubular crystallizer. Nine thermocouples labeled as T1 to T9 were inserted to record a temperature profile thoroughly in the tubular crystallizer.

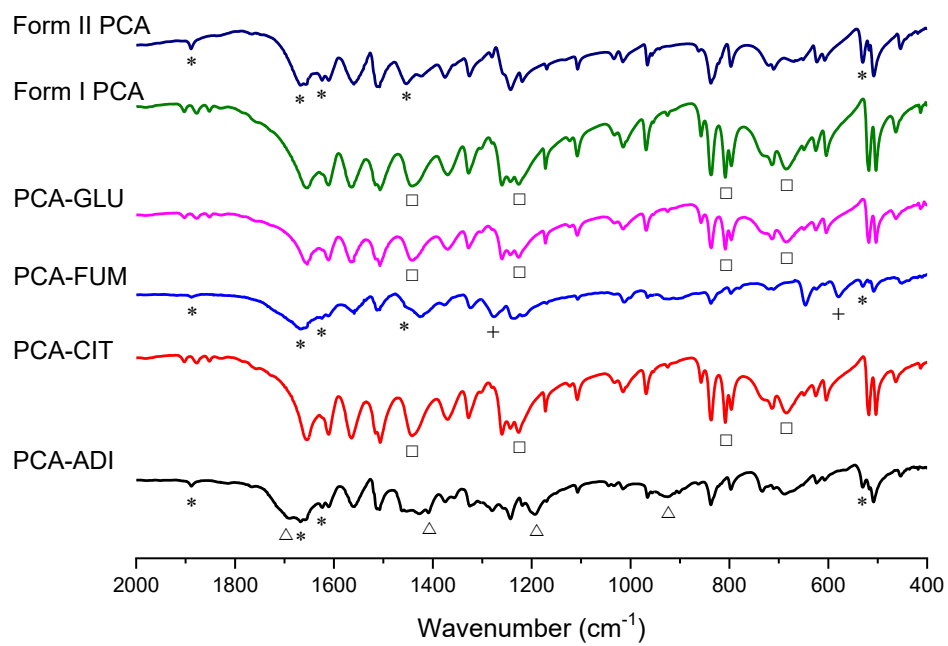

(a)

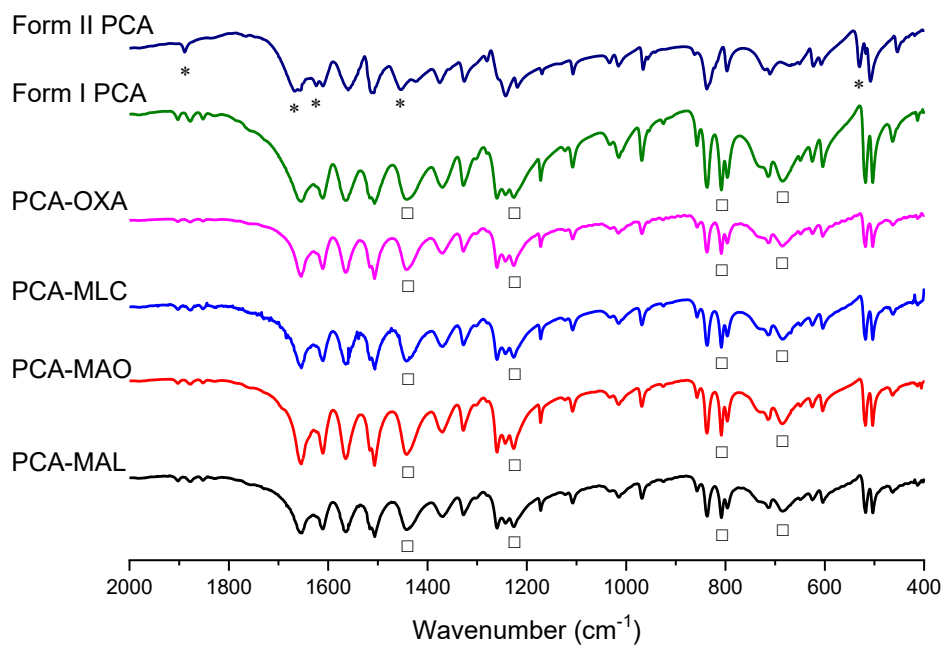

(b)

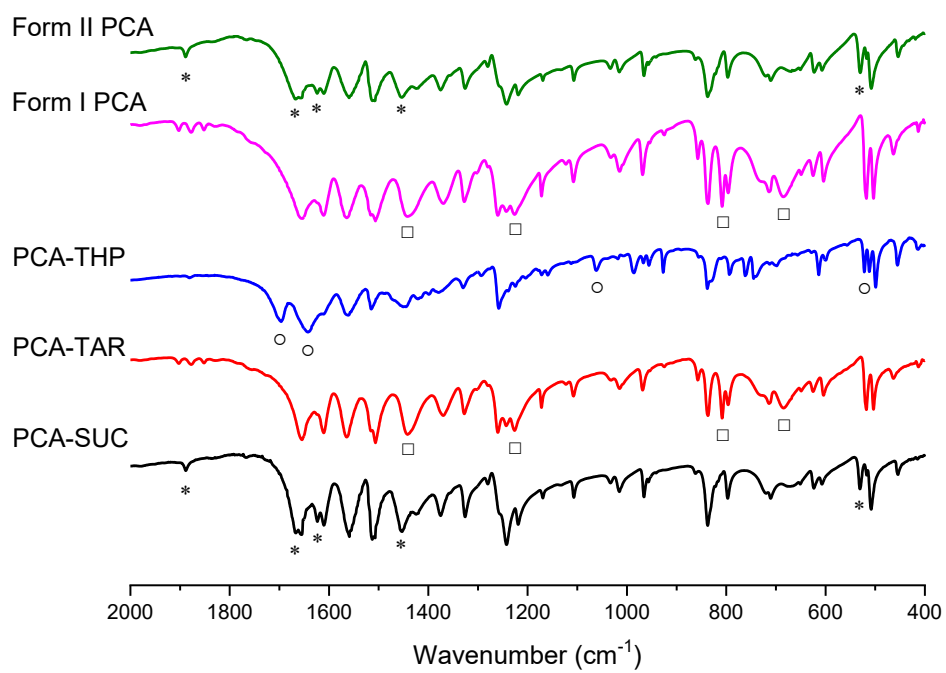

(c)

**Figure S3.** FTIR spectra of the PCA crystals produced by Screening Method 1 with different additives. The characteristic peaks of Form I PCA, Form II PCA, ADI, FUM, and 1:1 PCA-THP co-crystal are labeled by □, \*, △, +, and ○, respectively.

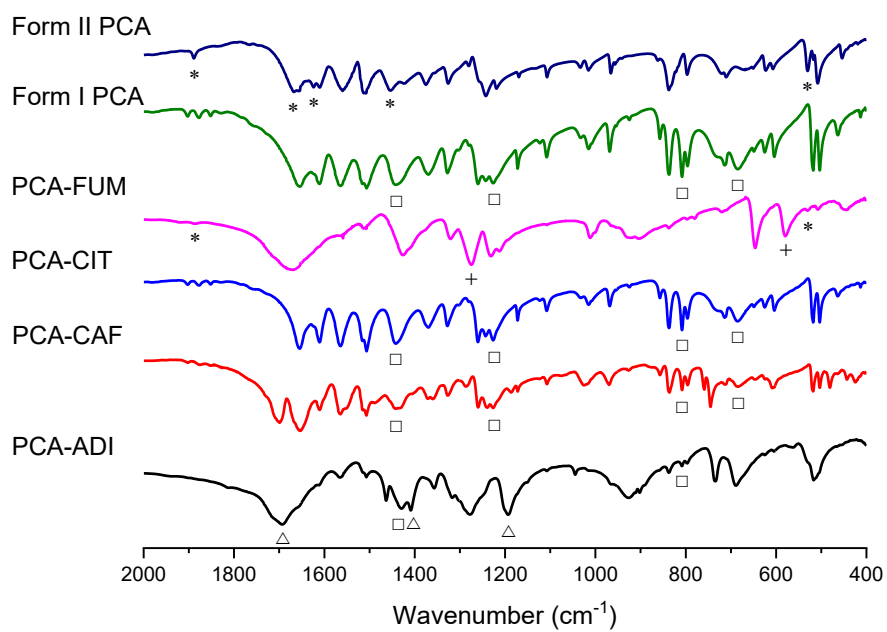

(a)

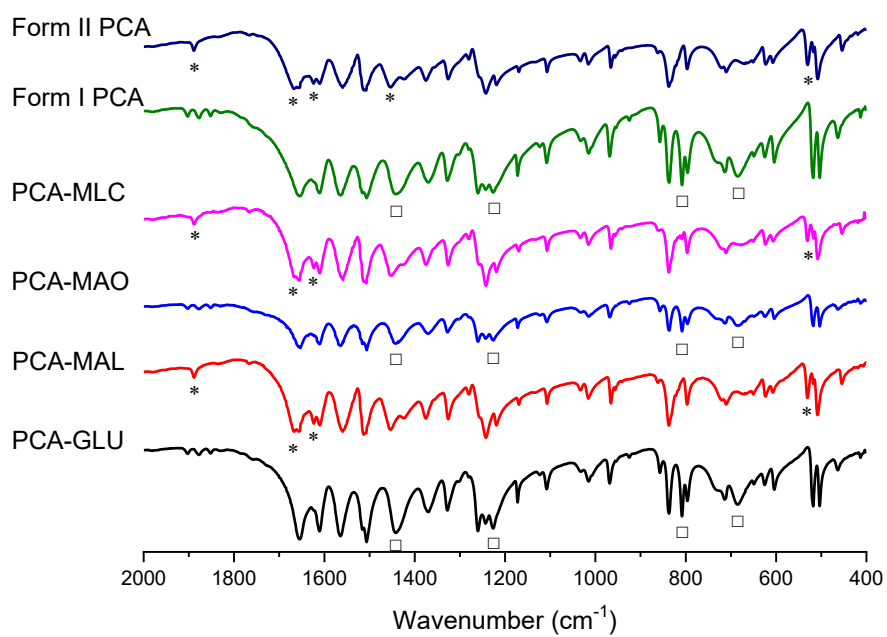

(b)



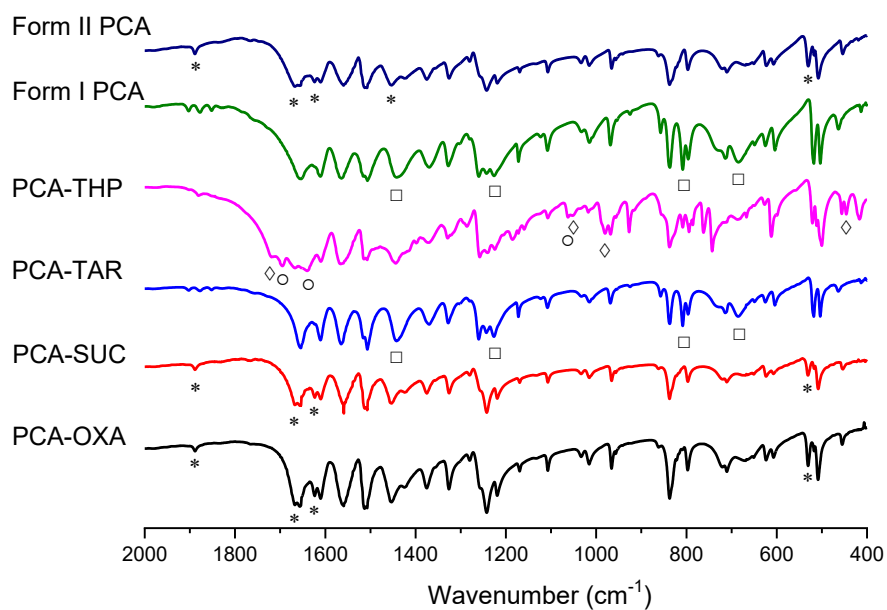

(c)

**Figure S4.** FTIR spectra of the PCA crystals produced by Screening Method 2 with different additives. The characteristic peaks of Form I PCA, Form II PCA, ADI, FUM, THP, and 1:1 PCA-THP co-crystal are labeled by  $\square$ ,  $*$ ,  $\triangle$ ,  $+$ ,  $\diamond$ , and  $\circ$ , respectively.

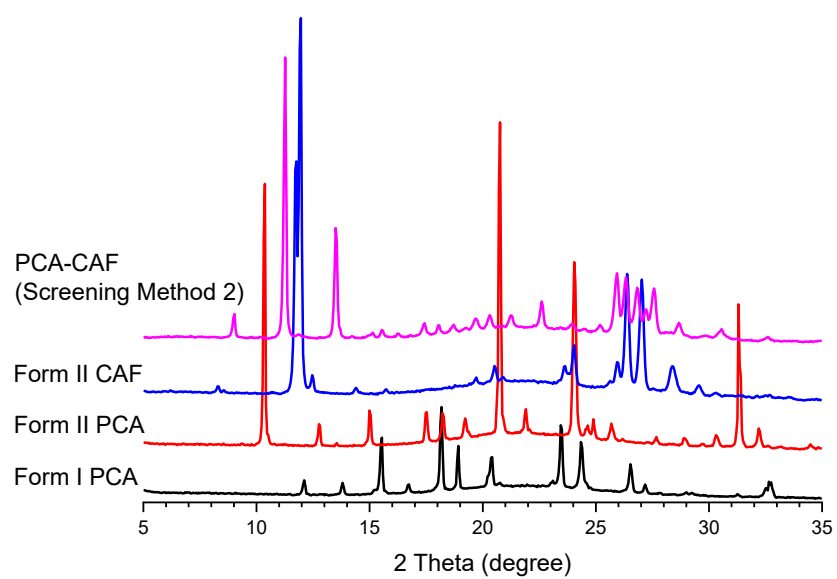

**Figure S5.** PXRD patterns of Forms I and II PCA, Form II CAF, and PCA-CAF co-crystal (Screening Method 2).

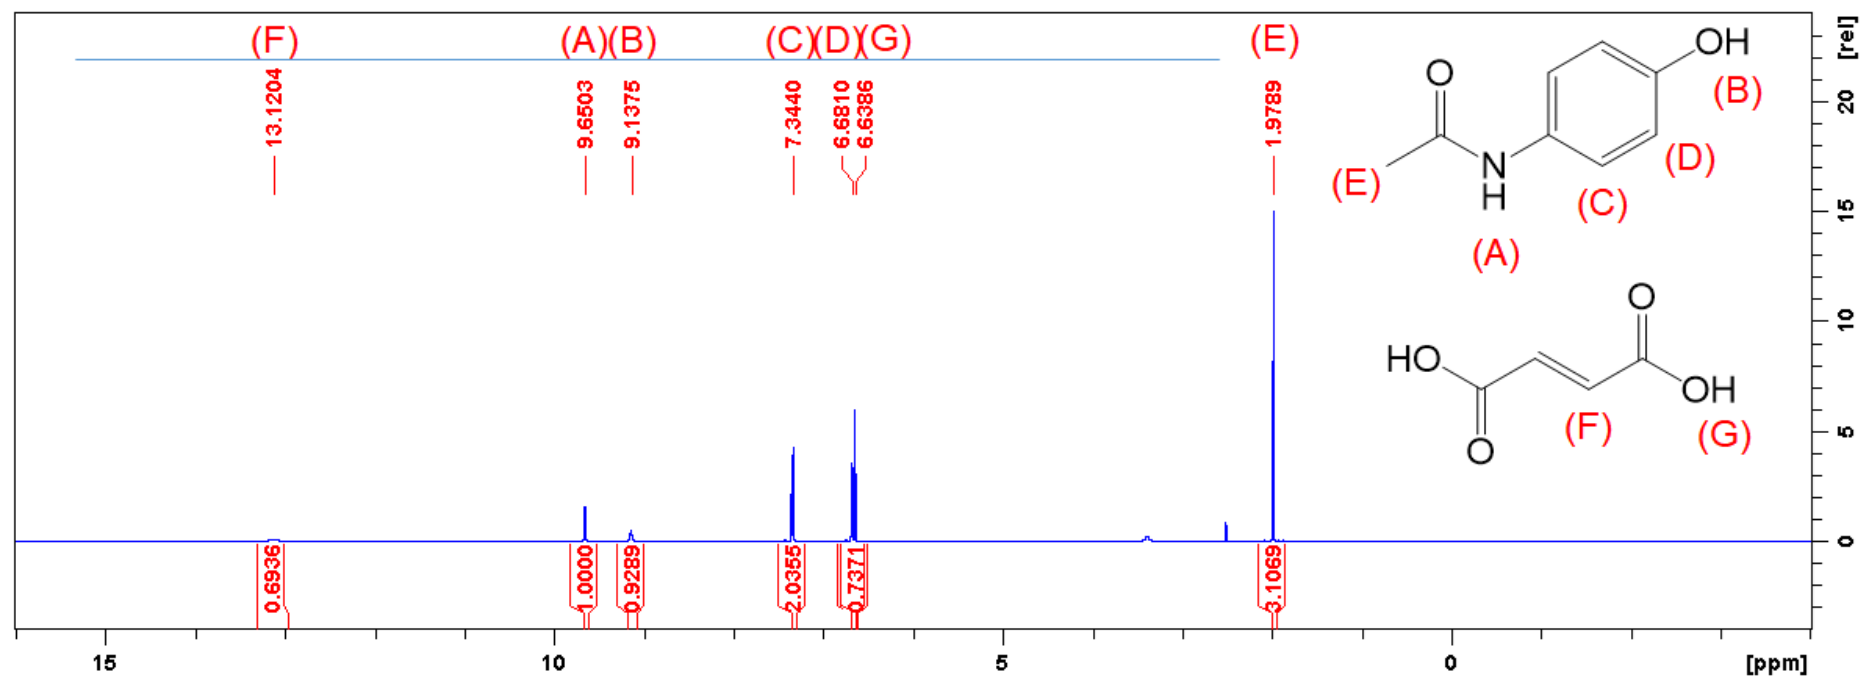

**Figure S6.**  $^1\text{H}$  NMR spectrum of Form II PCA produced from the PCA-MAL solution by Screening Method 2.

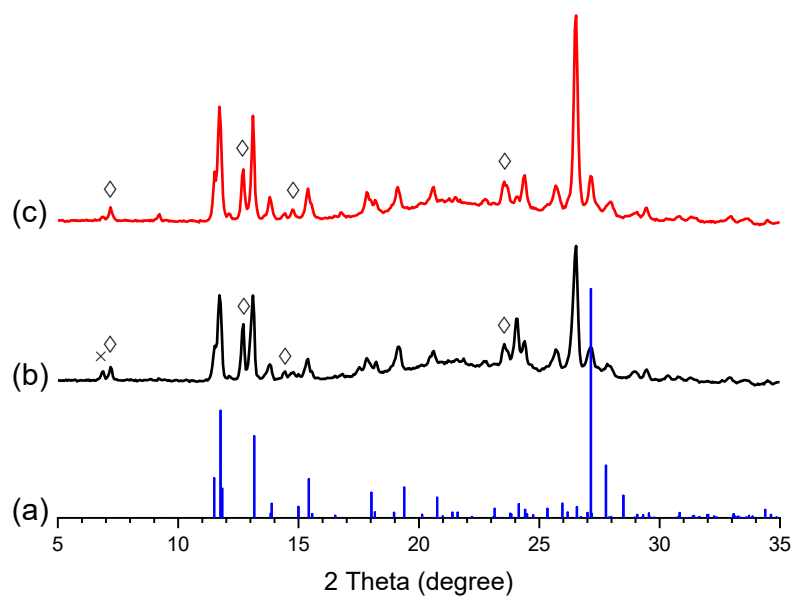

**Figure S7.** (a) Theoretical diffraction pattern of 1:1 PCA-THP co-crystal from the Cambridge Crystallographic Data Centre (CCDC) with a CCDC identifier: KIGLUI, and PXRD patterns of the PCA crystals produced by (b) Screening Method 1 and (c) Screening Method 2 in the presence of THP. The characteristic peaks of Form II THP and unknown species are labeled by ◇ and ×, respectively.

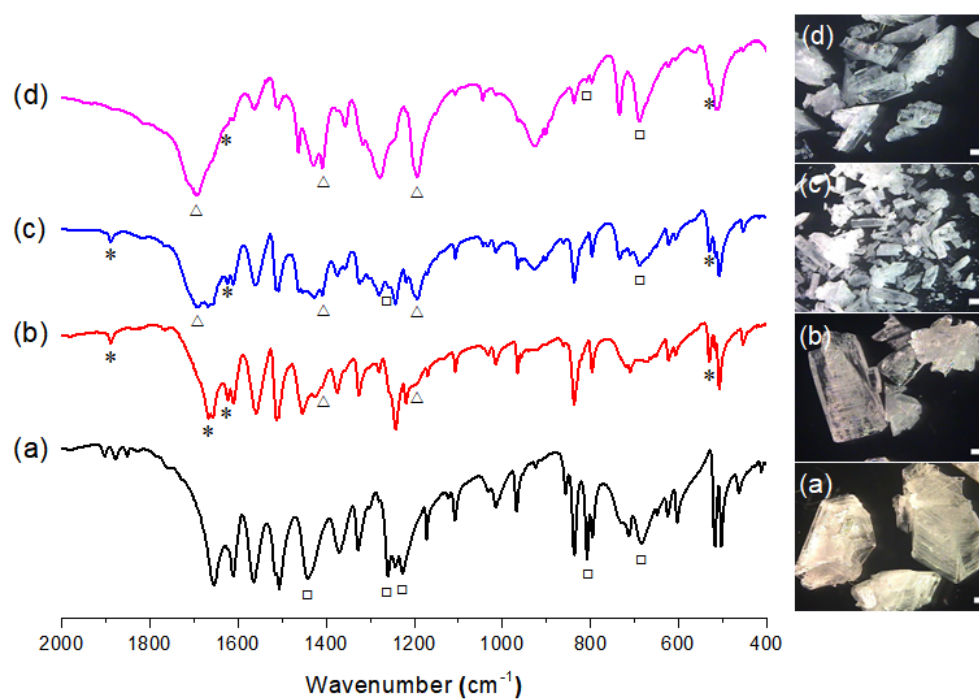

**Figure S8.** FTIR spectra and OM images of the PCA crystals produced by cooling crystallization at (a) 25, (b) 50, (c) 75, and (d) 100 wt% of ADI (scale bar = 500 μm). The characteristic peaks of Form I PCA, Form II PCA, and ADI are labeled by □, \*, and △, respectively.

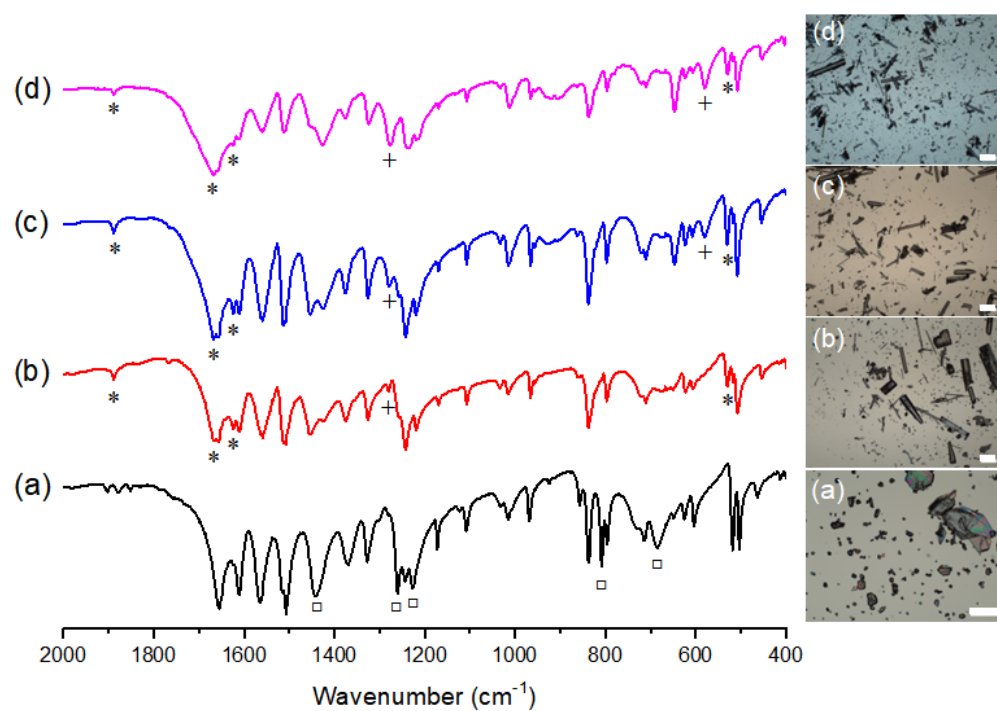

**Figure S9.** FTIR spectra and OM images of the PCA crystals produced by cooling crystallization at (a) 10, (b) 20, (c) 30, and (d) 50 wt% of FUM (scale bar = 200  $\mu\text{m}$ ). The characteristic peaks of Form I PCA, Form II PCA, and FUM are labeled by  $\square$ ,  $*$ , and  $+$ , respectively.

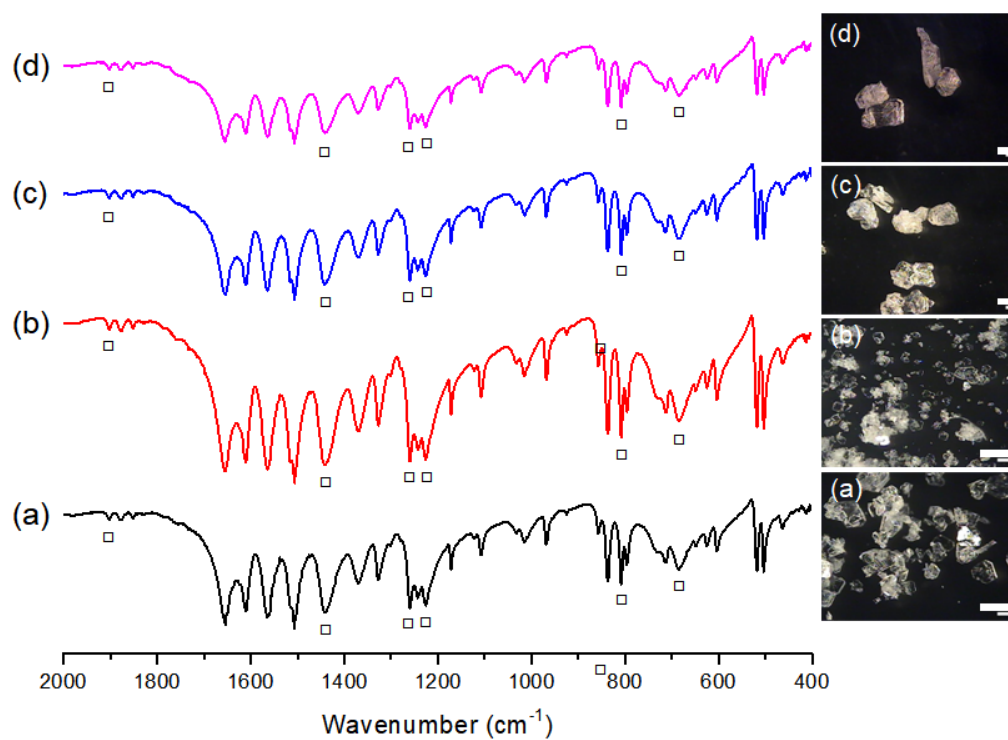

**Figure S10.** FTIR spectra and OM images of the PCA crystals produced by cooling crystallization at (a) 25, (b) 50, (c) 75, and (d) 100 wt% of MLC (scale bar = 500 μm). The characteristic peaks of Form I PCA are labeled by □.

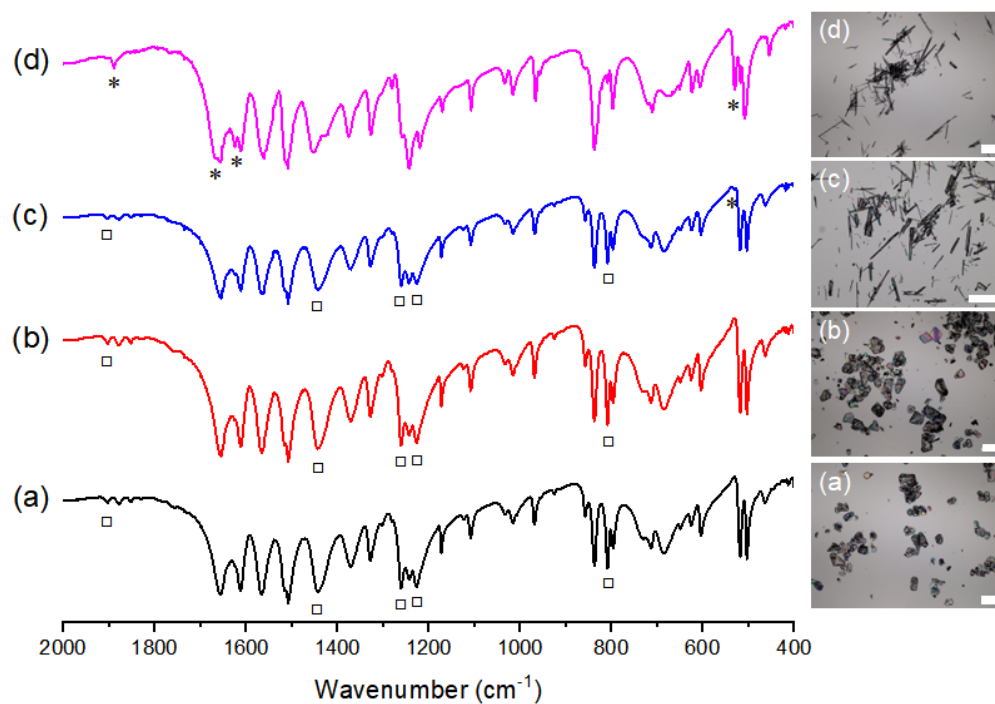

**Figure S11.** FTIR spectra and OM images of the PCA crystals produced by cooling crystallization at (a) 30, (b) 60, (c) 90, and (d) 120 wt% of OXA (scale bar = 200  $\mu\text{m}$ ). The characteristic peaks of Form I PCA and Form II PCA are labeled by  $\square$  and  $*$ , respectively.



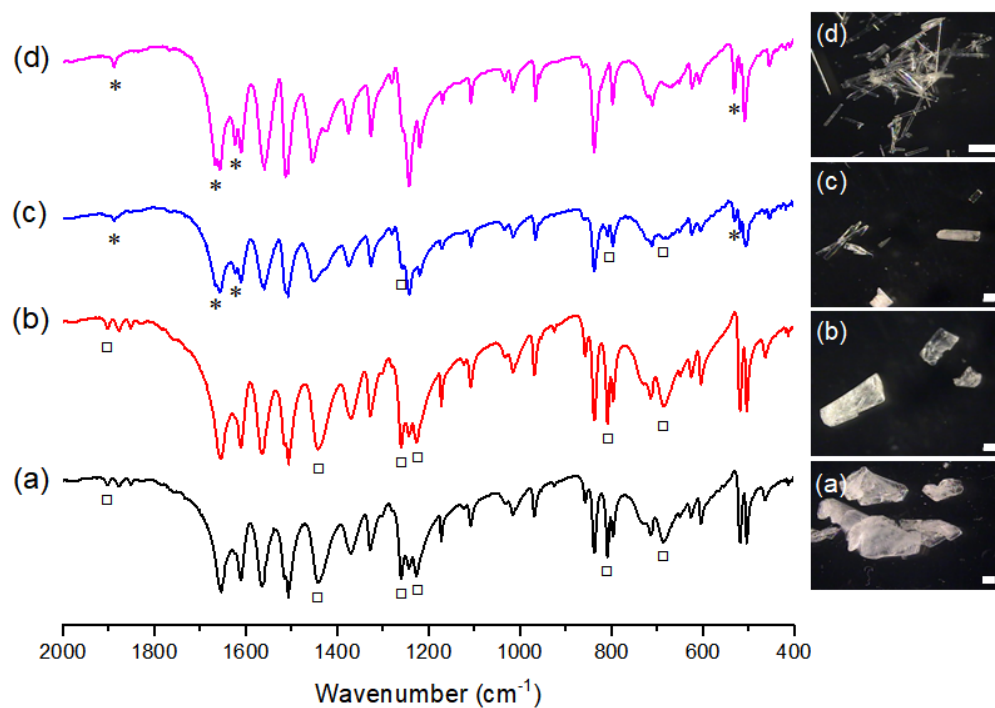

**Figure S12.** FTIR spectra and OM images of the PCA crystals produced by cooling crystallization at (a) 25, (b) 50, (c) 75, and (d) 100 wt% of SUC (scale bar = 500 μm). The characteristic peaks of Form I PCA and Form II PCA are labeled by □ and \*, respectively.

| Expt. | At induction temp.                                                                | 5 min after induction                                                              | At the end                                                                          |
|-------|-----------------------------------------------------------------------------------|------------------------------------------------------------------------------------|-------------------------------------------------------------------------------------|
| 1     | 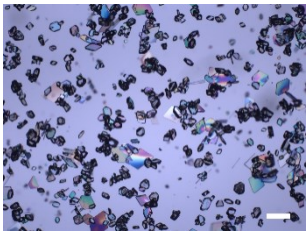 |  |  |
| 2     |  |  |  |
| 3     |  |  |  |

**Figure S13.** OM images of the PCA crystals produced by batch cooling crystallization using a 0.5 L-sized glass vessel in Expt. 1 to 3 (scale bar = 200  $\mu\text{m}$ ).

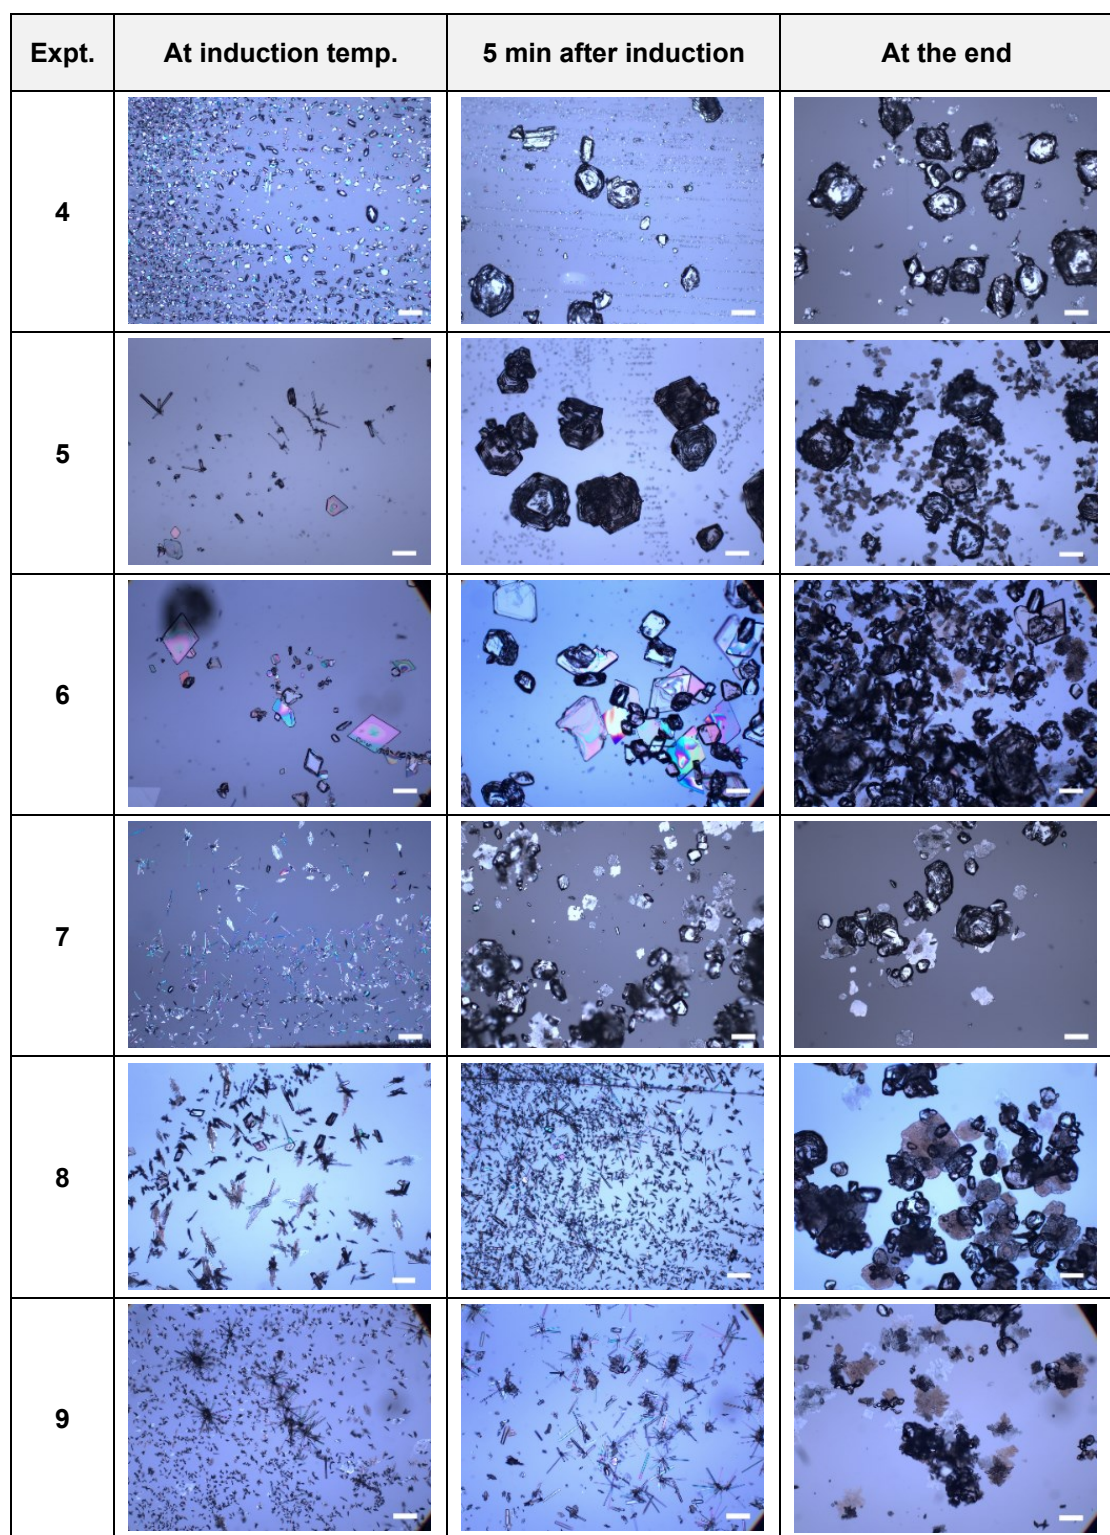

**Figure S14.** OM images of the PCA crystals produced by batch cooling crystallization with FUM using a 0.5 L-sized glass vessel in Expt. 4 to 9 (scale bar = 200  $\mu\text{m}$ ).



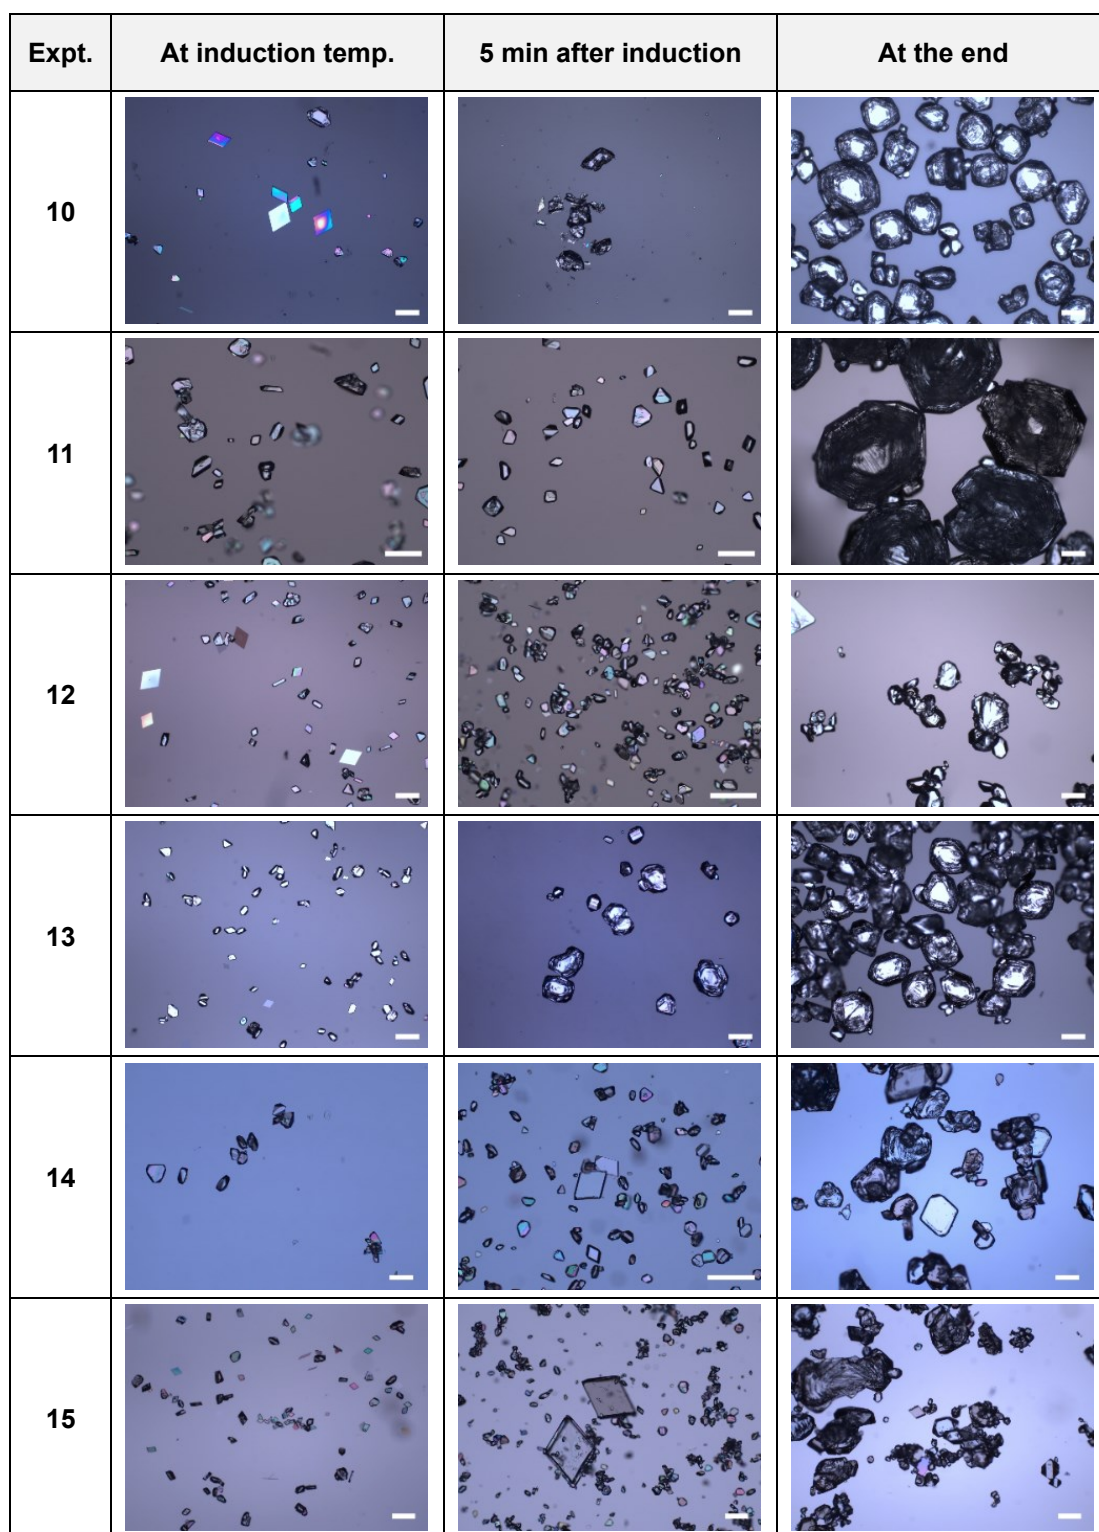

**Figure S15.** OM images of the PCA crystals produced by batch cooling crystallization with OXA using a 0.5 L-sized glass vessel in Expt. 10 to 15 (scale bar = 200  $\mu\text{m}$ ).

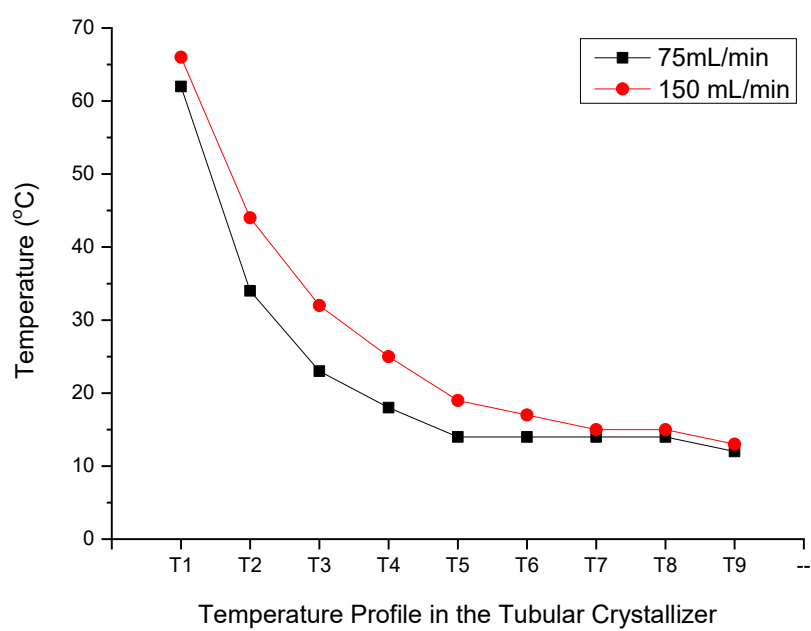

**Figure S16.** Temperature profiles determined at nine different positions in the tubular crystallizer with two flow rates of 75 and 150 mL/min.
